# Supplementary material for: Targeting Of Somatic Hypermutation By immunoglobulin Enhancer And Enhancer-Like Sequences
Source: PLOS journal article supplement (doi:10.1371/journal.pbio.1001831), 2014-04-01
Supplement: S7 (10.1371/journal.pbio.1001831.s007) [file journal.pbio.1001831.s007]

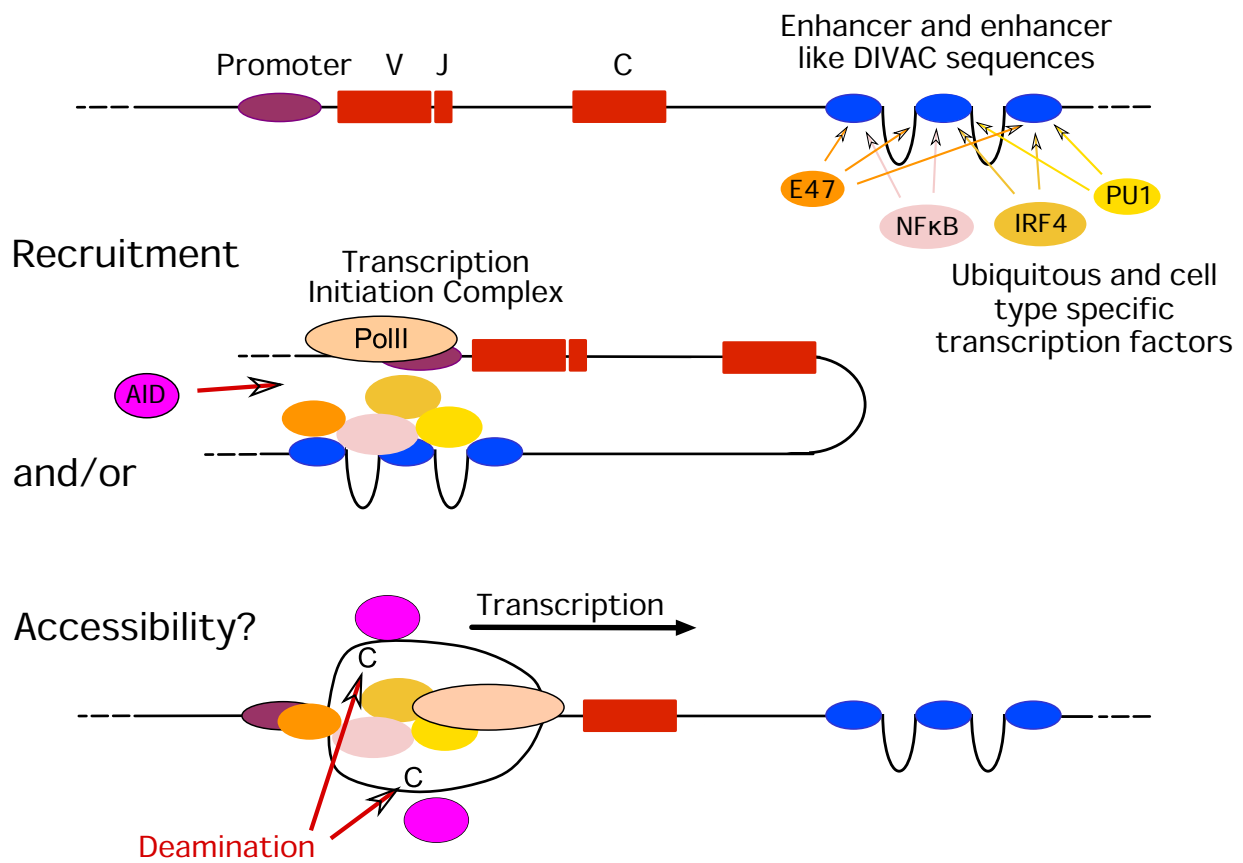

Figure S7
